# Supplementary material for: A conserved function of Human DLC3 and Drosophila Cv-c in testis development
Source: eLife. 2022 Nov 3;11:e82343. doi: 10.7554/eLife.82343 (PMC9678365; doi:10.7554/eLife.82343)
Supplement: Figure 3—source data 1. [file elife-82343-fig3-data1.xlsx]

## Sheet: Figure 3-source data 1
			Figure 3-source data 1J
Date	nos::GFP	Nº GC	Nº GC with Blebs			Date	nos::GFP;cv-cC524	Nº GC	Nº GC with Blebs
	Serie						Serie
2020-10-23	2	11	3			2020-10-23	34	19	3
	4	14	1				27	18	3				nos::GFP	nos::GFP;cv-cC524
	8	15	2				21	20	4			Blebs	44	272
	10	14	0				40	15	5			No Blebs	531	472
	12	14	2				18	11	3
	19	12	0				16	18	3
	21	13	0				6	15	4
	23	12	2				32	16	6
	6	14	1				30	16	5
	16	14	0				29	17	8
	25	11	1				25	16	7
	27	17	1				14	12	3
	29	10	0				10	15	7
	33	15	4				8	15	7
	35	16	3				2	12	5
2020-11-13	4	14	0			2020-11-13	35	15	6
	10	13	2				29	17	12
	7	14	0				22	14	4
	32	16	2				20	13	7
	27	14	2				16	15	7
	17	16	0				2	16	5
2020-12-03	2	14	3				19	19	6
	5	13	1				15	19	6
	7	15	0				13	18	4
	17	14	2				9	15	0
	15	17	0				6	11	5
	13	12	2				4	18	9
	11	12	2			2020-12-03	30	18	7
	9	17	0				18	20	8
2020-11-24	29	16	1				26	18	9
	23	17	1				24	20	10
	21	16	0				22	21	7
	14	19	1				18	20	10
	19	18	2				16	15	9
	16	14	2				14	23	14
	12	19	1				12	15	10
	10	13	0				8	10	5
	8	15	0				2	25	12
	4	11	0			2020-11-24	21	15	4
	C4	14	0				20	18	3
							10	16	2
							14	21	8
							4	18	4
							8	14	3
							6	12	3
