# Supplementary material for: A conserved function of Human DLC3 and Drosophila Cv-c in testis development
Source: eLife. 2022 Nov 3;11:e82343. doi: 10.7554/eLife.82343 (PMC9678365; doi:10.7554/eLife.82343)
Supplement: Figure 4—source data 1. [file elife-82343-fig4-data1.xlsx]

## Sheet: Figure 4- source data1 
Figure 4-source data 1B
twist-G4;cvcC524
	Normal	Abnormal	Total
cv-cC524	0	13	13
DLC3WT	18	7	25
DLC3S993N	6	32	38
Figure 4-source data 1C
twist-G4;cvcC524
	Normal	Abnormal	Total
cv-cWT	16	18	34
cv-cGAPmut	45	11	56
cvc∆START	5	26	31
