# Supplementary material for: A conserved function of Human DLC3 and Drosophila Cv-c in testis development
Source: eLife. 2022 Nov 3;11:e82343. doi: 10.7554/eLife.82343 (PMC9678365; doi:10.7554/eLife.82343)
Supplement: Figure 5—figure supplement 1—source data 1. [file elife-82343-fig5-figsupp1-data1.xlsx]

## Sheet: Figure 5—figure supplement 1
Figure 5—figure supplement 1-Source data 1E						Figure 5—figure supplement 1-Source data 1F
twist-G4;cvcC524						C587-G4; cvcC525
	Normal	Abnormal	Total				Normal	Abnormal	Total
cv-cC524	0	13	13			cv-cC524	0	24	24
cv-cWT	16	18	34			cv-cWT	25	64	89
cv-cGAPmut	45	11	56			cv-cGAPmut	78	57	135
cvc∆START	5	26	31			cvc∆START	2	29	31
DLC3WT	18	7	25			DLC3WT	19	26	45
DLC3S993N	6	32	38			DLC3S993N	4	46	50
