# Supplementary material for: A conserved function of Human DLC3 and Drosophila Cv-c in testis development
Source: eLife. 2022 Nov 3;11:e82343. doi: 10.7554/eLife.82343 (PMC9678365; doi:10.7554/eLife.82343)
Supplement: Figure 6—figure supplement 1—source data 1. [file elife-82343-fig6-figsupp1-data1.xlsx]

## Sheet: Supp. Figure 5-source data 1
Figure 6—figure supplement 1- Source data 1G
	twistG4;cv-cC524
	twistG4;cv-c C524	cv-c WT;cv-cC524	cv-c GAPmut; cv-cC524	cv-c ∆START; cv-cC524	DLC3 WT;cv-cC524	DLC3 S993N;cv-cC524
ECM broken	15	35	12	17	14	24
ECM continuous	0	39	30	1	25	4
Total	15	74	42	18	39	28
Figure 6—figure supplement 1- Source data 1H
	C587G4;cv-cC524
	C587G4;cv-c C524	cv-c WT;cv-cC524	cv-c GAPmut; cv-cC524	cv-c ∆START; cv-cC524	DLC3 WT;cv-cC524	DLC3 S993N;cv-cC524
ECM broken	18	13	16	19	12	35
ECM continuous	0	22	28	3	20	3
Total	18	35	44	22	32	38
