# Supplementary material for: A conserved function of Human DLC3 and Drosophila Cv-c in testis development
Source: eLife. 2022 Nov 3;11:e82343. doi: 10.7554/eLife.82343 (PMC9678365; doi:10.7554/eLife.82343)
Supplement: Figure 6—source data 1. [file elife-82343-fig6-data1.xlsx]

## Sheet: Figure 6-source data 1
Figure 6-source data 1I
	PerlecanGFP;cv-cC524/TM3	PerlecanGFP;cv-cC524
ECM broken	1	22
ECM no broken	53	2
