# Supplementary material for: A model of shield-strata interaction and its implications for active shield setting requirements
Source: eLife journal article supplement (doi:10.7554/elife.82343), 1991-12-01
Supplement: supp [file elife_poa_e82343_Figure_5_figure_supplement_1_source_data_1.xlsx]

## Sheet: Supp. Figure 4-source data1
Supplementary Figure 4-Source data 1E						Supplementary Figure 4-Source data 1F
twist-G4;cvcC524						C587-G4; cvcC525
	Normal	Abnormal	Total				Normal	Abnormal	Total
cv-cC524	0	13	13			cv-cC524	0	24	24
cv-cWT	16	18	34			cv-cWT	25	64	89
cv-cGAPmut	45	11	56			cv-cGAPmut	78	57	135
cvc∆START	5	26	31			cvc∆START	2	29	31
DLC3WT	18	7	25			DLC3WT	19	26	45
DLC3S993N	6	32	38			DLC3S993N	4	46	50
