# Supplementary material for: A model of shield-strata interaction and its implications for active shield setting requirements
Source: eLife journal article supplement (doi:10.7554/elife.82343), 1991-12-01
Supplement: supp [file elife_poa_e82343_Figure_6_figure_supplement_1_source_data_1.xlsx]

## Sheet: Supp. Figure 5-source data 1
Supplementary Figure 5- Source data 1G
	twistG4;cv-cC524
	twistG4;cv-c C524	cv-c WT;cv-cC524	cv-c GAPmut; cv-cC524	cv-c ∆START; cv-cC524	DLC3 WT;cv-cC524	DLC3 S993N;cv-cC524
ECM broken	15	35	12	17	14	24
ECM continuous	0	39	30	1	25	4
Total	15	74	42	18	39	28
Supplementary Figure 5- Source data 1H
	C587G4;cv-cC524
	C587G4;cv-c C524	cv-c WT;cv-cC524	cv-c GAPmut; cv-cC524	cv-c ∆START; cv-cC524	DLC3 WT;cv-cC524	DLC3 S993N;cv-cC524
ECM broken	18	13	16	19	12	35
ECM continuous	0	22	28	3	20	3
Total	18	35	44	22	32	38
